# Supplementary material for: Trajectory of Unawareness of Memory Decline in Individuals With Autosomal Dominant Alzheimer Disease
Source: PubMed Central journal article supplement (PMC7711319; doi:10.1001/jamanetworkopen.2020.27472), 2020-12-02
Supplement: jamanetwopen-e2027472-s001.pdf [file jamanetwopen-e2027472-s001.pdf]

## Supplementary Online Content

Vannini P, Hanseeuw BJ, Gatchel JR, et al. Trajectory of unawareness of memory decline in individuals with autosomal dominant Alzheimer disease. *JAMA Netw Open*. 2020;3(12):e2027472. doi:10.1001/jamanetworkopen.2020.27472

**eTable.** Memory Complaints and Awareness Scores Split by Age and Mutation Carrier Groups

This supplementary material has been provided by the authors to give readers additional information about their work.

**eTable.** Memory Complaints and Awareness Scores Split by Age and Mutation Carrier Groups

| Age   | Participant Complaints |                 |              | Partners Complaints |                 |                  | Awareness Score                        |                                        |                  |
|-------|------------------------|-----------------|--------------|---------------------|-----------------|------------------|----------------------------------------|----------------------------------------|------------------|
|       | Non-carriers           | Carriers        | p            | Non-carriers        | Carriers        | p                | Non-carriers                           | Carriers                               | p                |
| ≤ 27  | 12.6<br>[3, 27]        | 11.6<br>[3, 26] | 0.08         | 8.4<br>[1, 22]      | 8.6<br>[2, 21]  | 0.71             | +4.2<br>[-8, 17]<br><b>p&lt;0.001</b>  | +2.9<br>[-12, 14]<br><b>p&lt;0.001</b> | 0.05             |
| 28-35 | 13.5<br>[2, 30]        | 13.8<br>[2, 27] | 0.72         | 9.5<br>[2, 26]      | 11.5<br>[2, 25] | <b>0.04</b>      | +3.9<br>[-10, 18]<br><b>p&lt;0.001</b> | +2.4<br>[-15, 17]<br><b>p=0.04</b>     | 0.16             |
| 36-43 | 14.3<br>[3, 31]        | 17.7<br>[3, 38] | <b>0.007</b> | 9.9<br>[1, 27]      | 17.4<br>[2, 39] | <b>&lt;0.001</b> | +4.3<br>[-12, 19]<br><b>p&lt;0.001</b> | +0.3<br>[-12, 15]<br>p=0.80            | <b>0.01</b>      |
| 44-51 | 15.7<br>[3, 35]        | 21.5<br>[6, 42] | <b>0.001</b> | 11.5<br>[1, 29]     | 24.8<br>[3, 40] | <b>&lt;0.001</b> | +4.2<br>[-11, 21]<br><b>p&lt;0.001</b> | -3.3<br>[-30, 14]<br><b>p=0.05</b>     | <b>&lt;0.001</b> |
| ≥ 52  | 15.0<br>[2, 33]        | 18.6<br>[3, 39] | 0.10         | 13.1<br>[1, 28]     | 27.3<br>[9, 44] | <b>&lt;0.001</b> | +1.9<br>[-14, 18]<br><b>p=0.006</b>    | -8.6<br>[-34, 12]<br><b>p=0.005</b>    | <b>&lt;0.001</b> |

Participant complaints, partner complaints, and awareness scores are raw scores out of a maximum of 45 points obtained from 15 questions answered on a Likert scale from 0 to 3 (0=never, 1=rarely, 2=sometimes, 3=always). Significant p-values (two-tail p-values<0.05) are highlighted in bold. The 5<sup>th</sup> and 95<sup>th</sup> percentiles are under brackets. The p-values in the 'Awareness Score' columns are one-sample t-tests (Does the awareness score differ from 0?).
